# Supplementary material for: Biorefinery approach for lignocellulosic biomass valorisation with an acidic ionic liquid
Source: Royal Society of Chemistry journal article supplement (doi:10.1039/c8gc01763h), 2018-01-01
Supplement: c8gc01763h1.pdf [file c8gc01763h1.pdf]

## Electronic Supplementary Information (ESI)

### Biorefinery approach for lignocellulosic biomass valorisation with acidic ionic liquid

André M. da Costa Lopes<sup>1,2</sup>, Roberto M. G. Lins<sup>1,3</sup>, Ricardo A. Rebelo<sup>3</sup> and Rafał M. Łukasik<sup>1\*</sup>

<sup>1</sup> *Laboratório Nacional de Energia e Geologia, Unidade de Bioenergia, 1649-038 Lisbon, Portugal.*

<sup>2</sup> *LAQV/REQUIMTE, Departamento de Química, Faculdade de Ciências e Tecnologia, Universidade Nova de Lisboa, 2829-516 Caparica, Portugal*

<sup>3</sup> *Universidade Regional de Blumenau, Departamento de Química, 89012-900 Blumenau, Brazil*

\*Corresponding author: phone: +351210924600 ext. 4224; e-mail address: [rafal.lukasik@lneg.pt](mailto:rafal.lukasik@lneg.pt)

## Data from reactions of wheat straw with aqueous ionic liquid solution

**Table S1.** The yields of main products, *i.e.* pentoses (sum of arabinose and xylose); furfural; glucose; 5-hydroxymethylfurfural (5-HMF) and acetic acid found in the liquids produced in the biomass reactions.

| Entry <sup>a</sup> | $\log R_o$ | Yield (mol%) <sup>b</sup> |          |         |       |             |
|--------------------|------------|---------------------------|----------|---------|-------|-------------|
|                    |            | Pentoses                  | Furfural | Glucose | 5-HMF | Acetic acid |
| 3                  | 2.45       | 20.9                      | 0.0      | 3.1     | 0.0   | 36.3        |
| 9                  | 3.07       | 24.7                      | 0.0      | 2.7     | 0.4   | 50.0        |
| 5                  | 3.19       | 26.4                      | 0.0      | 3.2     | 0.7   | 43.5        |
| 7                  | 3.19       | 26.6                      | 0.0      | 3.2     | 0.1   | 50.2        |
| 12                 | 3.28       | 28.7                      | 0.0      | 2.7     | 0.3   | 54.5        |
| 11                 | 3.80       | 43.7                      | 0.1      | 3.2     | 0.6   | 61.2        |
| 15                 | 3.92       | 54.1                      | 0.6      | 3.6     | 1.1   | 73.5        |
| 1                  | 3.92       | 54.5                      | 0.2      | 4.2     | 1.2   | 78.2        |
| 13                 | 4.02       | 56.2                      | 1.1      | 3.8     | 1.6   | 81.2        |
| 10                 | 4.53       | 67.5                      | 2.8      | 5.1     | 1.9   | 85.7        |
| 4                  | 4.66       | 74.4                      | 1.1      | 5.5     | 1.4   | 86.5        |
| 6                  | 4.66       | 67.0                      | 4.5      | 6.0     | 2.6   | 92.4        |
| 8                  | 4.76       | 76.8                      | 3.4      | 6.4     | 2.1   | 91.1        |
| 2                  | 5.39       | 77.5                      | 11.4     | 8.4     | 2.5   | 102.3       |
| 14                 | 6.56       | 59.1                      | 33.2     | 9.3     | 2.5   | 103.4       |

<sup>a</sup> the entry according to Table 2; <sup>b</sup> For quantification please refer to next sections.

**Table S2.** The yield of recovered solid (SY) and composition of solid and recovery yields of main components *i.e.* arabinoxylan (sum of xylan and arabinan); acetyl groups; glucan; Klason lignin and ash produced in biomass reactions.

| Entry <sup>a</sup> | $\log R_o$ | SY<br>wt.% | Composition (wt.%) <sup>b</sup><br>(recovery yield (g/100 g of the initial amount present in the feedstock)) <sup>b</sup> |               |              |               |              |
|--------------------|------------|------------|---------------------------------------------------------------------------------------------------------------------------|---------------|--------------|---------------|--------------|
|                    |            |            | Arabinoxylan                                                                                                              | Acetyl groups | Glucan       | Klason Lignin | Ash          |
| native             | -          | 100.0      | 22.1 (100.0)                                                                                                              | 2.7 (100.0)   | 38.5 (100.0) | 17.7 (100.0)  | 10.7 (100.0) |
| 3                  | 2.45       | 82.7       | 20.6 (77.1)                                                                                                               | 1.8 (54.6)    | 43.2 (92.8)  | 17.4 (81.1)   | 3.9 (29.9)   |
| 9                  | 3.07       | 73.2       | 19.5 (64.7)                                                                                                               | 1.5 (39.8)    | 48.8 (92.8)  | 20.1 (83.1)   | 4.1 (28.0)   |
| 5                  | 3.19       | 76.0       | 18.3 (63.1)                                                                                                               | 1.5 (40.9)    | 47.4 (93.6)  | 21.6 (92.9)   | 3.7 (26.3)   |
| 7                  | 3.19       | 72.6       | 19.1 (62.7)                                                                                                               | 1.6 (42.1)    | 48.5 (91.5)  | 20.6 (84.6)   | 3.4 (22.9)   |
| 12                 | 3.28       | 69.9       | 18.4 (58.3)                                                                                                               | 0.9 (23.5)    | 52.3 (94.5)  | 18.8 (74.2)   | 4.3 (28.1)   |
| 11                 | 3.80       | 65.7       | 14.1 (42.0)                                                                                                               | 0.6 (15.2)    | 45.9 (78.4)  | 33.4 (124.0)  | 4.8 (29.4)   |
| 15                 | 3.92       | 63.8       | 13.1 (37.9)                                                                                                               | 0.3 (7.7)     | 58.1 (96.2)  | 20.6 (74.1)   | 5.0 (30.1)   |
| 1                  | 3.92       | 63.5       | 11.6 (33.2)                                                                                                               | 0.4 (8.9)     | 54.9 (90.5)  | 20.8 (74.6)   | 5.0 (29.9)   |
| 13                 | 4.02       | 63.3       | 12.7 (36.4)                                                                                                               | 0.1 (2.8)     | 49.1 (80.7)  | 29.8 (106.5)  | 5.4 (32.1)   |
| 10                 | 4.53       | 59.6       | 10.9 (29.5)                                                                                                               | 0.0 (0.0)     | 60.7 (93.9)  | 22.7 (76.4)   | 2.8 (15.6)   |
| 4                  | 4.66       | 62.2       | 11.0 (30.8)                                                                                                               | 0.4 (9.5)     | 58.1 (93.8)  | 24.0 (84.3)   | 4.4 (25.3)   |
| 6                  | 4.66       | 60.0       | 11.3 (30.6)                                                                                                               | 0.3 (7.5)     | 53.5 (83.4)  | 27.5 (93.1)   | 4.2 (23.4)   |
| 8                  | 4.76       | 60.3       | 11.6 (31.7)                                                                                                               | 0.2 (5.6)     | 57.8 (90.6)  | 26.1 (89.1)   | 4.1 (23.1)   |
| 2                  | 5.39       | 57.4       | 7.2 (18.8)                                                                                                                | 0.0 (0.0)     | 61.9 (92.4)  | 24.8 (80.5)   | 5.7 (30.7)   |
| 14                 | 6.56       | 56.3       | 5.5 (14.0)                                                                                                                | 0.0 (0.0)     | 60.4 (88.3)  | 33.7 (107.4)  | 6.1 (32.0)   |

<sup>a</sup> the entry according to Table 2; <sup>b</sup> For quantification please refer to next sections.

**Table S3.** The yields of main products, *i.e.* pentoses (sum of arabinose and xylose); furfural; glucose; 5-HMF and acetic acid found in liquid from reaction at conditions of 141.0 °C, 57.8 wt.% H<sub>2</sub>O and 90.0 min.

| Yield (mol%) <sup>a</sup> |          |         |       |             |
|---------------------------|----------|---------|-------|-------------|
| Pentoses                  | Furfural | Glucose | 5-HMF | Acetic acid |
| 81.6                      | 11.2     | 8.8     | 2.0   | 105.5       |

<sup>a</sup> For quantification please refer to next sections.

**Table S4.** The yield of recovered solid (SY) and composition of solid and recovery yields of main components *i.e.* arabinoxylan (sum of xylan and arabinan); acetyl groups; glucan; Klason lignin and ash produced in biomass reaction at conditions of 141.0 °C, 57.8 wt.% H<sub>2</sub>O and 90.0 min.

| SY<br>wt% | Composition (wt.) <sup>a</sup><br>(recovery yield (g/100 g of the initial amount present in the feedstock)) <sup>a</sup> |               |             |             |            |
|-----------|--------------------------------------------------------------------------------------------------------------------------|---------------|-------------|-------------|------------|
|           | Arabinoxylan                                                                                                             | Acetyl groups | Glucan      | KL          | Ash        |
| 55.8      | 6.6 (16.7)                                                                                                               | 0.0 (0.0)     | 65.6 (95.0) | 27.2 (85.7) | 6.8 (35.3) |

<sup>a</sup> For quantification please refer to next sections.

**Table S5.** The coefficients of model parameters and their statistical significance.

| Model parameters      | $\beta_0$ | $\beta_1$ | $\beta_2$ | $\beta_3$ | $\beta_{11}$ | $\beta_{22}$ | $\beta_{33}$ | $\beta_{12}$ | $\beta_{13}$ | $\beta_{23}$ |
|-----------------------|-----------|-----------|-----------|-----------|--------------|--------------|--------------|--------------|--------------|--------------|
| Coefficients          | 70.36     | 28.33     | 2.59      | 5.95      | -34.95       | -8.43        | -8.20        | 5.76         | 2.59         | 2.69         |
| <i>p</i> -value       | 0.00      | 0.00      | 0.72      | 0.45      | 0.01         | 0.44         | 0.42         | 0.74         | 0.89         | 0.84         |
| <i>R</i> <sup>2</sup> | 0.91      |           |           |           |              |              |              |              |              |              |

**Table S6.** Statistical approach of ANOVA performed to data obtained from experimental design.

| Source of variation | DF <sup>a</sup> | SS <sup>b</sup> | MS <sup>c</sup> | <i>F</i> -value | <i>p</i> -value |
|---------------------|-----------------|-----------------|-----------------|-----------------|-----------------|
| Regression          | 9               | 5400.50         | 600.06          | 5.90            | 0.03            |
| Residual Error      | 5               | 508.49          | 101.70          | -               | -               |
| Total               | 14              | 5908.99         | -               | -               | -               |

<sup>a</sup> Degrees of freedom; <sup>b</sup> Sum of squares; <sup>c</sup> Mean square;

**Table S7.** The yields of main products, *i.e.* pentoses (sum of arabinose and xylose); furfural; glucose; 5-HMF and acetic acid found in liquid from reactions at optimal conditions (131.0 °C, 58.7 wt.% H<sub>2</sub>O and 88.0 min ) with fresh IL and with recovered IL.

| Entry        | Yield (mol%) <sup>a</sup> |          |         |       |             |
|--------------|---------------------------|----------|---------|-------|-------------|
|              | Pentoses                  | Furfural | Glucose | 5-HMF | Acetic acid |
| Fresh IL     | 80.5                      | 5.3      | 7.3     | 1.7   | 100.7       |
| Recovered IL | 78.5                      | 4.0      | 5.4     | 3.2   | 121.8       |

<sup>a</sup> For quantification please refer to next sections.

**Table S8.** The yield of recovered solid (SY) and composition of solid and recovery yields of main components *i.e.* arabinoxylan (sum of xylan and arabinan); acetyl groups; glucan; Klason lignin and ash produced in biomass reactions at optimal conditions (131.0 °C, 58.7 wt.% H<sub>2</sub>O and 88.0 min) with fresh IL and with recovered IL.

| Entry        | SY<br>Wt.% | Composition (wt.%) <sup>a</sup><br>(recovery yield (g/100 g of the initial amount present in the feedstock)) <sup>a</sup> |               |             |             |            |
|--------------|------------|---------------------------------------------------------------------------------------------------------------------------|---------------|-------------|-------------|------------|
|              |            | Arabinoxylan                                                                                                              | Acetyl groups | Glucan      | KL          | Ash        |
| Fresh IL     | 57.8       | 6.7 (17.6)                                                                                                                | 0.0 (0.0)     | 60.6 (90.9) | 29.3 (95.7) | 3.4 (18.4) |
| Recovered IL | 60.2       | 9.3 (25.3)                                                                                                                | 0.0 (0.0)     | 59.4 (92.9) | 23.1 (78.5) | 5.2 (29.0) |

<sup>a</sup> For quantification please refer to next sections.

### Determination of severity factor ( $\log R_O$ )

For comparison purposes and to provide a mathematic tool for direct analysis of the influence of three studied parameters a severity factor ( $\log R_O$ ) for reactions with catalysts was calculated using the

following equation: 
$$\log R_O = \log_{10} \left( e^{\left( \frac{T_r - T_b}{\omega} \right)} \times \Delta t \right)$$
, where  $T_r$  and  $T_b$  are absolute reaction temperature and reference temperature when hydrolysis initiates with [emim][HSO<sub>4</sub>], respectively, and are expressed in °C, and  $\omega$  is a dimensionless constant that translates the effect of the temperature in the conversion. Yields of hemicellulose hydrolysis with [emim][HSO<sub>4</sub>] obtained in this work were used to estimate the values of  $T_b$  and  $\omega$ .

The value of  $T_b$  was attained by applying the equation below obtained from Doehlert experimental design (section 2.4 of the article) for all the hemicellulose hydrolysis experiments examined. The point (x,0,0) represents the value of  $T_b$  and by solving the equation obtained from experimental design in the following form  $Y = 77.01 + 30.83X_1 - 0.59X_2 - 0.62X_1X_2 - 21.20X_1^2 - 11.00X_2^2$ , where  $Y$  is the percentage of hemicellulose hydrolysis and  $X_1, X_2$  are the temperature (°C) and H<sub>2</sub>O content (wt%), respectively. The result gave  $T_b = 80.25$  °C.

The value of  $\omega$  was attained by representation of the experimental results using the following equation:  $Y = mX + B$ , where  $Y = \ln(-\ln(1 - \alpha))$ , where  $\alpha$  is the hydrolysis of hemicellulose and  $X$  is the severity factor calculated in the following manner:  $X = \log R_O = \log_{10}(R_{heating} + R_{isothermal})$ , where  $R_{heating}$  is the severity factor for heating and  $R_{isothermal}$  is the severity factor for isothermal condition process. Hence the value of  $\omega$  was 7.2, obtained by maximization of  $R^2$ .

Therefore,  $\log R_O$  for each reaction was calculated through the following equation:

$$\log R_O = \log_{10} \left( e^{\left( \frac{T_r - 80.25}{7.2} \right)} \times \Delta t \right)$$

### Calculations of the yields of products in the liquid samples

$$\text{pentose yield (mol\%)} = \frac{m_{\text{pentose}}}{m_{\text{arabinoxylan}_{\text{native}}}} \times \frac{132}{150} \times 100$$

$$\text{glucose yield (mol\%)} = \frac{m_{\text{glucose}}}{m_{\text{glucan}_{\text{native}}}} \times \frac{162}{180} \times 100$$

$$\text{furfural yield (mol\%)} = \frac{m_{\text{furfural}}}{m_{\text{arabinoxylan}_{\text{native}}}} \times \frac{132}{96} \times 100$$

$$\text{HMF yield (mol\%)} = \frac{m_{5\text{-HMF}}}{m_{\text{glucan}_{\text{native}}}} \times \frac{162}{126} \times 100$$

$$\text{acetic acid yield (mol\%)} = \frac{m_{\text{acetic acid}}}{m_{\text{acetyl group}_{\text{native}}}} \times \frac{59}{60} \times 100$$

*native* means the amount of fraction in native biomass

### Calculations of the recovery yields in the solid phase samples

$$\text{solid recovery yield (wt.\%)} = \frac{m_{\text{dry biomass}_{\text{initial}}}}{m_{\text{dry biomass}_{\text{after reaction}}}} \times 100$$

$$\text{arabinoxylan recovery yield (wt.\%)} = \frac{m_{\text{arabinoxylan}}}{m_{\text{arabinoxylan}_{\text{native}}}} \times 100$$

$$\text{acetyl groups recovery yield (wt.\%)} = \frac{m_{\text{acetyl groups}}}{m_{\text{acetyl groups}_{\text{native}}}} \times 100$$

$$\text{glucan recovery yield (wt.\%)} = \frac{m_{\text{glucan}}}{m_{\text{glucan}_{\text{native}}}} \times 100$$

$$\text{lignin retained in the solid (wt.\%)} = \frac{m_{\text{lignin}}}{m_{\text{lignin}_{\text{native}}}} \times 100$$

$$\text{ash recovery yield (wt.\%)} = \frac{m_{\text{ash}}}{m_{\text{ash}_{\text{native}}}} \times 100$$

*native* means the amount of fraction in native biomass; *initial* means the amount of biomass used in the reaction; *after reaction* means the amount of biomass recovered after the reaction with IL;

### Calculations of the solid phase samples' composition

$$\text{arabinoxylan content (wt.\%)} = \frac{m_{\text{arabinoxylan}}}{m_{\text{recovered biomass}}} \times 100$$

$$\text{acetyl groups content (wt.\%)} = \frac{m_{\text{acetyl groups}}}{m_{\text{recovered biomass}}} \times 100$$

$$\text{glucan content (wt.\%)} = \frac{m_{\text{glucan}}}{m_{\text{recovered biomass}}} \times 100$$

$$\text{lignin content (wt.\%)} = \frac{m_{\text{lignin}}}{m_{\text{recovered biomass}}} \times 100$$

$$\text{ash content (wt.\%)} = \frac{m_{\text{ash}}}{m_{\text{recovered biomass}}} \times 100$$
